## 1 Title page

2 **Title:** Design and implementation of a system for automated monitoring of adherence to  
3 evidenced-based clinical guideline recommendations

4 **Authors:** Gregor Lichtner<sup>1,2,3</sup>, Claudia Spies<sup>3,4</sup>, Carlo Jurth<sup>3</sup>, Thomas Bienert<sup>3</sup>, Anika Müller<sup>3</sup>,  
5 Oliver Kumpf<sup>3</sup>, Vanessa Piechotta<sup>5</sup>, Nicole Skoetz<sup>5</sup>, Monika Nothacker<sup>6</sup>, Martin  
6 Boeker<sup>7</sup>, Joerg J Meerpohl<sup>8,9</sup>, Falk von Dincklage<sup>1,2,3</sup>

7 <sup>1</sup> Universitätsmedizin Greifswald, Department of Anesthesia, Critical Care, Emergency  
8 and Pain Medicine, Greifswald, Germany.

9 <sup>2</sup> Charité – Universitätsmedizin Berlin, corporate member of Freie Universität Berlin  
10 and Humboldt-Universität zu Berlin, Institute of Medical Informatics, Berlin, Germany.

11 <sup>3</sup> Charité – Universitätsmedizin Berlin, corporate member of Freie Universität Berlin  
12 and Humboldt-Universität zu Berlin, Department of Anesthesiology and Operative  
13 Intensive Care Medicine, Berlin, Germany.

14 <sup>4</sup> Einstein Center Digital Future, Berlin, Germany.

15 <sup>5</sup> Evidence-based Oncology, Department I of Internal Medicine, Center for Integrated  
16 Oncology Aachen Bonn Cologne Duesseldorf, Faculty of Medicine and University  
17 Hospital Cologne, University of Cologne, Cologne, Germany.

18 <sup>6</sup> Institute for Medical Knowledge Management, Association of the Scientific Medical  
19 Societies (AWMF), c/o University of Marburg, Marburg, Germany.

20 <sup>7</sup> Institute for Artificial Intelligence and Informatics in Medicine, Chair of Medical  
21 Informatics, Medical Center rechts der Isar, School of Medicine, Technical University  
22 of Munich, Munich, Germany.

23 <sup>8</sup> Institute for Evidence in Medicine, Medical Center & Faculty of Medicine, University  
24 of Freiburg, Freiburg, Germany.

25 <sup>9</sup> Cochrane Germany, Cochrane Germany Foundation, Freiburg, Germany.

26

## 27 Abstract

### 28 Background

29 Clinical practice guidelines are systematically developed statements intended to optimize patient care.  
30 However, a gap-less implementation of guideline recommendations requires health care personnel  
31 not only to be aware of the recommendations and to support their content, but also to recognize every  
32 situation in which they are applicable. To not miss situations in which guideline recommendations  
33 should be applied, computerized clinical decision support could be given through a system that allows  
34 an automated monitoring of adherence to clinical guideline recommendation in individual patients.

### 35 Objectives

36 (1) To derive the requirements for a system that allows to monitor the adherence to evidence-based  
37 clinical guideline recommendations in individual patients, and based on these requirements, (2) to  
38 implement a software prototype that integrates clinical guideline recommendations with individual  
39 patient data and (3) to demonstrate the prototype's utility on a COVID-19 intensive care treatment  
40 recommendation.

### 41 Methods

42 We performed a work process analysis with experienced intensive care clinicians to develop a  
43 conceptual model of how to support guideline adherence monitoring in clinical routine and identified  
44 which steps in the model could be supported electronically. We then identified the core requirements  
45 of a software system for supporting recommendation adherence monitoring in a consensus-based  
46 requirements analysis within loosely structured focus group work of key stakeholders (clinicians,  
47 guideline developers, health data engineers, software developers). Based on these requirements, we  
48 implemented a prototype and demonstrated its functionality by integrating clinical data with a  
49 treatment recommendation.

### 50 Results

51 Based on our conceptual flow chart model of recommendation adherence monitoring in clinical  
52 routine, we identified four main requirements of a software system for automated support of  
53 recommendation adherence monitoring of in-hospital patients: (i) Ability to interpret guideline  
54 recommendations' semantics and logics, (ii) integration of clinical routine data from various underlying  
55 data structures, (iii) automatic adoption of new or updated guideline recommendations, and (iv) user  
56 interfaces optimized for distinct groups of users. Using a prototype implementation that fulfills these  
57 requirements, we demonstrate how such a system could be applied to monitor guideline  
58 recommendation adherence over time in clinical patients.

## 59 Conclusions

60 The four main requirements identified through our model-based analysis represent the most  
61 important aspects that need to be considered when developing a clinical decision support system for  
62 monitoring the adherence to evidence-based clinical guideline recommendations in individual  
63 patients. As each of the requirements corresponds to a different expertise (guideline development,  
64 health data engineering, software development, patient treatment), a modularized software  
65 architecture separated by area of required expertise seems favorable. Our prototype successfully  
66 demonstrates how such a modular architecture can be implemented to allow real-time monitoring of  
67 guideline recommendation adherence. This prototype, which we released as open source to invigorate  
68 collaboration, could serve as a basis for further development to integrate guideline recommendations  
69 with clinical information systems.

## 70 Introduction

71 Clinical practice guideline recommendations are intended to optimize patient care by assisting decision  
72 making of health care professionals within specific clinical circumstances [1–3]. Thus, clinical practice  
73 guideline recommendations are among the most important potential clinical decision support tools  
74 [4,5]. Considering and implementing such recommendations during patient management is expected  
75 to be associated with improved patient outcome, especially in the case of evidence-based  
76 recommendations that were developed based on systematic reviews and appraisal of the available  
77 evidence [6–8]. However, a gap-less implementation of clinical practice guideline recommendations  
78 in daily routine work requires health care professionals not only to be aware of the existence of the  
79 respective guideline recommendations, to understand and support their content, but also to correctly  
80 recognize all situations in which specific recommendations should be applied [9].

81 Meeting the latter requirement becomes particularly demanding in the interdisciplinary treatment of  
82 patients with complex conditions that affect multiple organ systems, as it is often the case in critical  
83 care medicine [10–12]. To ensure that all health care professionals have an active knowledge about all  
84 guideline recommendations that apply in such situations and that they correctly recognize every  
85 situation in which these recommendations should be applied can prove difficult. Thus, treatment in  
86 critical care medicine is at a comparably high risk of deviating from guideline recommendations [10].

87 Besides the multitude of simultaneously applicable guideline recommendations in critical care,  
88 another aspect that can strongly affect guideline recommendation adherence is a high frequency of  
89 changes in recommendations [11]. The coronavirus disease 2019 (COVID-19) pandemic presented an  
90 exemplary situation in which dissemination and implementation of guidelines via conventional  
91 processes struggled to hold pace with the rapid development of recommendations and the speed at  
92 which recommendations were updated and changed over time [13,14].

93 To counter such difficulties and assist implementation of clinical guideline recommendations by means  
94 of computerized clinical decision support, various machine-readable guideline recommendation  
95 formalisms have been developed [15–22]. However, these formalisms focus on representing the  
96 finalized guideline recommendations and do not consider the systematic development process from  
97 which evidence-based guideline recommendations are derived. We have recently developed a *Fast*  
98 *Healthcare Interoperability Resources* (FHIR)-based formalism for the computer-interpretable  
99 representation of the whole guideline recommendation development process from developing  
100 systematic reviews of primary studies, rating the certainty of the available body of evidence, and finally  
101 applying evidence-to-decision frameworks to derive the final recommendation, called *Clinical Practice*  
102 *Guidelines on Evidence-Based Medicine on FHIR* (CPG-on-EBMonFHIR; [23]).

103 Based on this representation, the aim of this study was (1) to collect and analyze the requirements for  
104 providing clinical decision support via automated monitoring of individual evidence-based guideline  
105 recommendation adherence, and (2) to design & implement a prototype that fulfills the requirements  
106 and (3) to test the prototype's applicability on real patient data.

107

## 108 Methods

### 109 Overview

110 To derive the requirements for a software system to monitor the adherence to clinical guideline  
111 recommendations, we first performed a work process analysis of the clinical processes that are to be  
112 supported by the system. After identifying and structuring these processes, we determined which  
113 subprocesses can be supported electronically and identified the requirements for how these  
114 subprocesses can be supported by a software system. Based on these requirements we designed a  
115 modular system architecture, which we implemented as an open-source prototype. To demonstrate  
116 the utility of the prototype implementation, we applied it to monitor the adherence to a COVID-19  
117 treatment guideline recommendation based on clinical data from a large European university hospital.

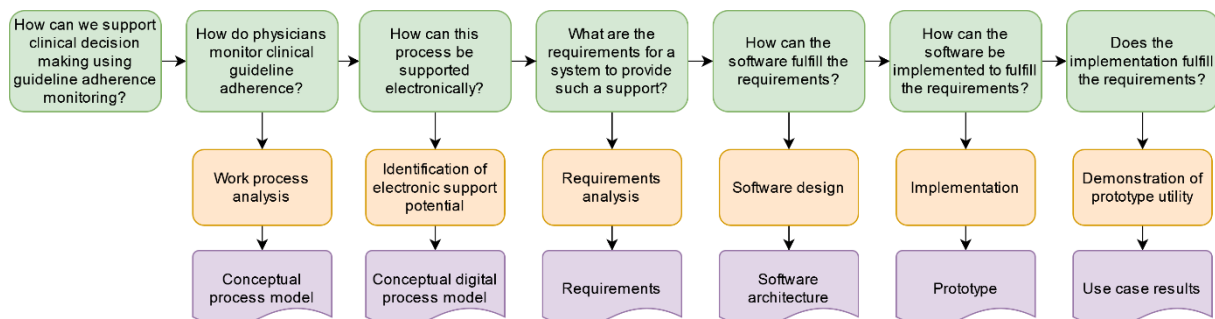

118  
119 *Figure 1: Flowchart of the study and the derived artefacts at each step.*

### 120 Work process analysis, identification of electronic support potential and requirements 121 analysis

122 To derive the requirements for the system, we first conducted a needs analysis for the users of the  
123 system, the clinical staff. This needs analysis was conducted as a work process analysis, in which five  
124 experienced clinicians contributed to flow chart modeling of how the adherence to guideline  
125 recommendations would be monitored in clinical practice. Modeling was performed based on an  
126 iterative feedback process, in which for each iteration the model was adapted until no further changes  
127 were required.

128 Based on the work process model, we identified which parts of this process could be supported  
129 electronically and developed a flow chart model of how clinicians would interact with an electronic  
130 system to achieve the goal of monitoring patient-specific guideline recommendation applicability and  
131 adherence. Identification of support potential and process modeling was again performed in an  
132 iterative feedback process among the same group of clinicians together with a health software  
133 architect.

134 To identify the requirements of the software system for monitoring individual recommendation  
135 applicability and adherence, we performed a comprehensive needs analysis for the system by involving  
136 key stakeholders:

- 137 1. Clinical staff, as they are the primary users of the system.
- 138 2. Clinical practice guideline developers, as they create and maintain the guideline  
139 recommendations that are used by the system.
- 140 3. Health data engineers familiar with hospital IT infrastructure, as the system is required to  
141 process data from electronic health records.
- 142 4. Software developers, as they are required to build, test, and maintain the system.

143 Stakeholders were recruited by convenience from participants at senior level of their respective field  
144 within the COVID-19 evidence ecosystem (CEOsys) project of the federal network of university medical  
145 centers (NUM) in Germany [24]. They were individually approached and requested to participate. No  
146 compensation was offered for participation. We required at least two participants per stakeholder  
147 group.

#### 148 [Software design and prototype implementation](#)

149 The software prototype was implemented in an agile, rapid application development approach. The  
150 architecture followed a microservice pattern to allow efficient separation of concerns and scalable and  
151 exchangeable deployments of the system within the heterogeneous clinical IT infrastructures. Each  
152 container exposes a RESTful application programming interface (API) specified according to the  
153 OpenAPI 2.0 standard [25]. Backend modules were implemented in Python 3.8 and the frontend  
154 modules using RShiny [26].

#### 155 [Demonstration of prototype utility](#)

156 To demonstrate the utility of the prototype, we connected it to anonymized clinical data of a large  
157 university hospital (Charité - Universitätsmedizin Berlin, Germany) and integrated a recent strong  
158 evidence-based guideline recommendation for the treatment of patients with severe or critical COVID-  
159 19 [27]. The use of the anonymized clinical data for research was approved by the local ethics  
160 committee (Ethikausschuss 4 am Campus Benjamin Franklin, Charité—Universitätsmedizin Berlin,  
161 Chairperson Prof. R. Stahlmann, Application Number EA4/008/19, approval date: 06 Feb 2019,  
162 amendment date: 14 May 2020).

163

## 164 Results

### 165 Work process analysis

166 The needs analysis with the clinical staff resulted in a flow chart describing the work process of how  
167 the adherence to guideline recommendations should be monitored (Figure 2 a). The core insight of the  
168 work process analysis was that to evaluate and monitor guideline recommendation adherence,  
169 clinicians always work at the ward level and examine each patient individually to see whether a  
170 guideline recommendation applies and whether it is fulfilled.

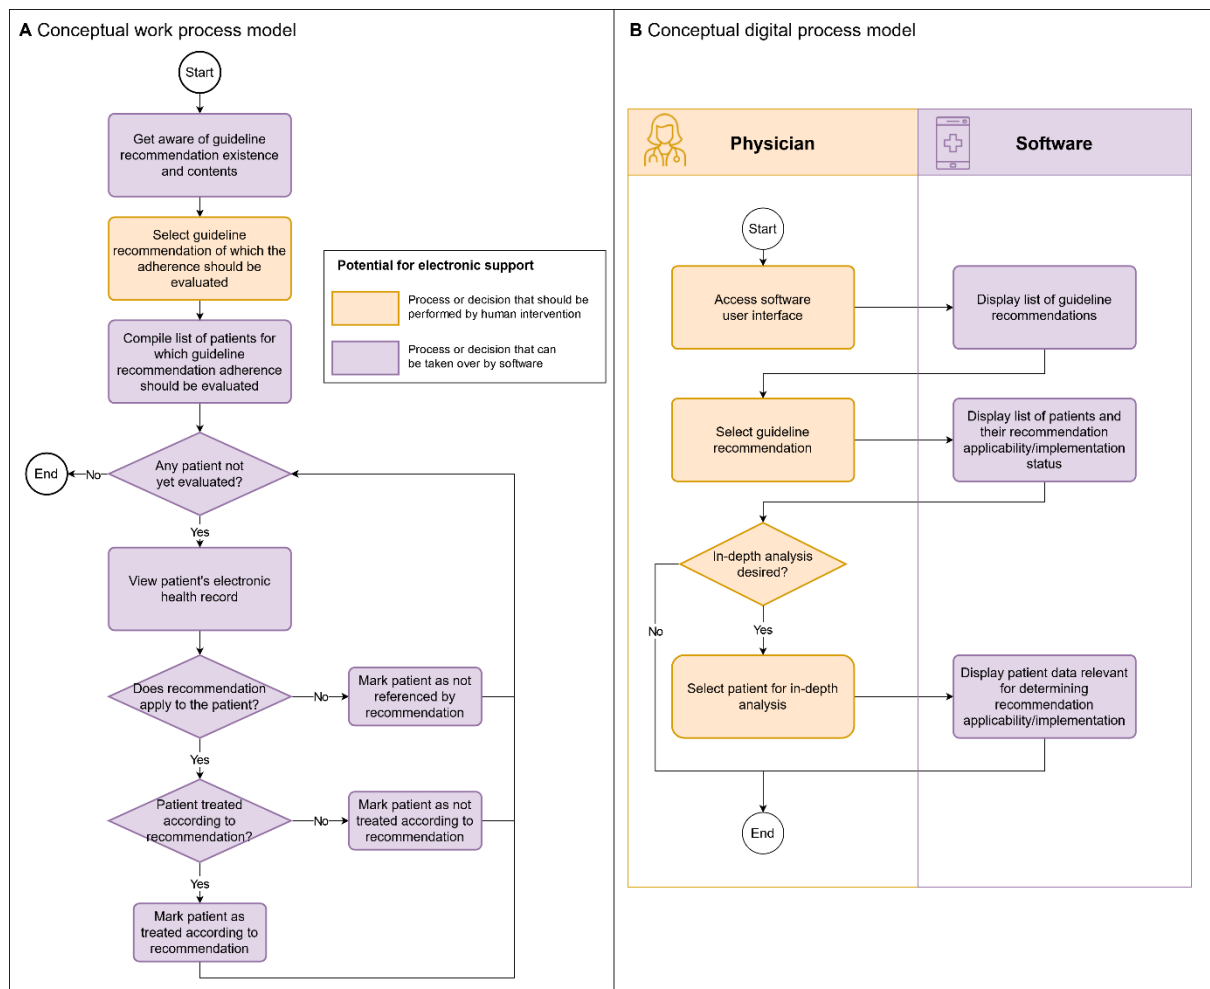

171

172 *Figure 2: Conceptual process models of recommendation adherence monitoring in current clinical*  
173 *practice and using an electronic support system.*

### 174 Identification of electronic support potential

175 Based on the work process model, the clinical staff together with a health software architect identified  
176 which steps could be supported or covered by an electronic system. We identified nearly all steps as  
177 susceptible to being taken over by a software system (Figure 2 a). The same group then determined  
178 how this process should be supported electronically and developed a corresponding model of the



179 digitized work process (Figure 2 b). The most important core insight of this analysis was the necessity  
180 to display the raw patient data that underlies the system's decision on recommendation  
181 applicability/adherence, since clinicians using a software-based decision support system to monitor  
182 recommendation adherence want to be able to examine the raw patient data that underlies the  
183 system's decision on recommendation applicability/adherence, to make sure that this data and  
184 decision is correct, as electronic health record data may contain errors.

## 185 Requirements analysis

186 For a computer system that should support the defined work process (Figure 2 a), we identified four  
187 core requirements in a series of focus work group feedback rounds.

188 Requirement #1: The system needs to be able to decide whether a guideline recommendation  
189 is applicable and whether a guideline recommendation is implemented for a specific patient

190 The task of checking whether a guideline's recommendation is applicable and whether it is  
191 implemented for an individual patient or not requires the system to be able to process both the  
192 semantical (i.e., what is the meaning of the words used in the recommendation) and logical (i.e., which  
193 of the words used in the recommendation define who the recommendation applies to and which  
194 words define what is to be done or not to be done) content of the recommendation. Therefore, the  
195 system needs to be provided with guideline recommendations in a format that is semantically correct,  
196 complete, and unambiguous.

197 We here focus on evidence-based guideline recommendations, which makes the decoding of the  
198 logical content of the recommendations particular easy: In the development process of evidence-  
199 based recommendations, it is standard practice to decompose the clinical question in consideration  
200 according to the PICO framework (population/patients, intervention, comparison, outcomes,) [28].  
201 Therefore, in these recommendations, the patients to which the guideline recommendation is  
202 applicable to (P in PICO) and the intervention (I in PICO) that is recommended are distinctly defined at  
203 its best beginning with the systematic reviews supporting evidence-based guideline recommendations.

204 Regarding the decoding and interpretation of the semantical content of guideline recommendations,  
205 we have developed a FHIR-based format for the representation of clinical practice guideline  
206 recommendations to provide an interoperable, standards-based guideline recommendation exchange  
207 format that fulfills the above requirements [23]. Moreover, a variety of formalisms for representing  
208 guideline recommendations in a computer-interpretable way exist [29–31] and any of these could be  
209 used, provided that they are able to represent guideline recommendations semantically correct,  
210 complete and unambiguous.

211 Requirement #2: The system needs to be able to integrate clinical data from different data  
212 formats and data structures

213 Despite a multitude of initiatives for standardization, patient data is often only available in proprietary  
214 and non-standardized data formats and data structures that differ between countries, hospitals or  
215 even wards in the same hospital. Therefore, to make the system applicable across various existing IT  
216 infrastructural settings, the second core requirement is that it needs to accept data in a standardized,  
217 interoperable format, into which all proprietary data formats can be converted. Among data formats  
218 that fulfill these requirements are the OMOP common data model (CDM) [32] or FHIR-based formats  
219 (e.g. the US Core Profiles [33] or the German Corona Consensus dataset [34]).

220 Requirement #3: The system needs to automatically adopt changes in clinical guideline  
221 recommendations

222 Clinical guideline recommendations are subject to change as medical knowledge advances.  
223 Considering the vast number of new findings being published in the medical literature every day and  
224 the subsequent frequency of guideline recommendation updates, any efforts to manually implement  
225 updated guideline recommendations in a software system can be expected to delay updates and pose  
226 a source of errors [11].

227 One aspect that especially complicates error-free manual implementation of guideline  
228 recommendations in a software system is that such a task requires the expertise of at least two  
229 different and highly specialized fields: the expertise of the medical subspecialty providing the guideline  
230 recommendation and the software development expertise necessary for implementation into a  
231 system. Having both at one's disposal for every single new or updated guideline recommendation is  
232 difficult and costly.

233 Therefore, the system needs to adopt changes in guideline recommendations without requiring  
234 changes in the system's software code itself. Instead, once changes in guideline recommendation are  
235 released by the responsible medical societies or other appropriate sources, these changes should be  
236 automatically adopted by the system without the requirement of any manual changes in the system's  
237 software.

238 Requirement #4: The system needs to provide user interfaces optimized for distinct user groups

239 Different users of the clinical decision support system require different user interfaces, depending on  
240 the specific work processes that are to be supported by the system. For example, medical or nursing  
241 staff working on individual patients require a system that is highly integrated with their standard  
242 patient data visualization used during the treatment process (e.g., the critical care information system  
243 used on the ward) to allow to integrate the decision support seamlessly into the individual patient

244 care. In contrast, cross section staff like quality officers or supervising staff require more  
 245 comprehensive overviews over multiple patients simultaneously, with less integration with other  
 246 patient data, as their work processes that are to be supported by the system are more disconnected  
 247 from individual patient care. Therefore, the fourth core requirement is that the user interface of the  
 248 system must be customizable to meet the specific requirements that allow integration into the work  
 249 processes of the respective groups of users that are to be supported.

## 250 Prototype implementation

251 Considering the advantages of a modular system where each module corresponds to a specific  
 252 specialty, we decided for a software architecture with four main modules that correspond to the  
 253 previously described four main requirements that each require the involvement of only one of the  
 254 three stakeholder groups besides the software developers (Figure 3; Table 1).

255

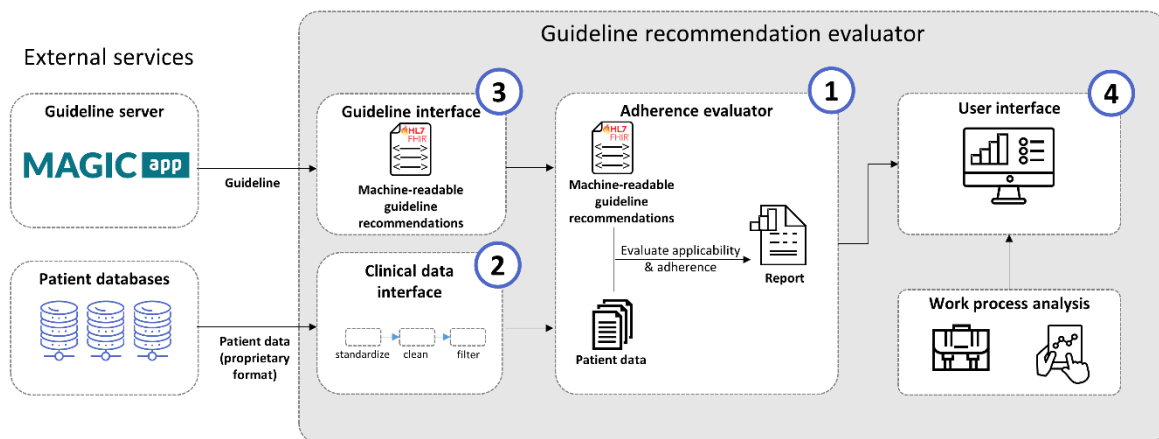

256

257 **Figure 3: Architecture of the guideline recommendation evaluator for the automated integration of**  
 258 **clinical guideline recommendations with real-time clinical data. Numbers indicate the requirement**  
 259 **that is associated with the module.**

| REQ | MODULE NAME         | DESCRIPTION                                                                                                                                                           | MAIN STAKEHOLDER GROUP                 |
|-----|---------------------|-----------------------------------------------------------------------------------------------------------------------------------------------------------------------|----------------------------------------|
| #1  | Adherence evaluator | Reads and interprets guideline recommendations, requests required data from hospital database and executes the conditions defined by the recommendations on the data. | Software developers                    |
| #2  | Data Interface      | Provides patient data in a standardized format; acts as converter/gateway to proprietary hospital databases.                                                          | Health data engineers                  |
| #3  | Guideline interface | Provides guideline recommendations in a computer-interpretable representation from a local or central repository.                                                     | Clinical practice guideline developers |
| #4  | User interface      | Provides visualization and interactivity of the guideline recommendation evaluation results to end users; can be optimized for different end user groups              | Clinical staff                         |

260

**Table 1: Overview of the prototype's modules and their matching requirement.**

261 The software was implemented as a containerized microservice architecture for effortless on-premises  
 262 deployment within individual hospitals' IT infrastructure, preventing any patient data from leaving the  
 263 hospitals' networks. We have designed the backend modules to be run within the same local network  
 264 with the only outside access possible to the user interface backend. Thus, in our prototype  
 265 implementation the user interface backend provides a user-level authentication to ensure only  
 266 authorized users can access the output of the system. Depending on the actual deployment scenario,  
 267 each of the microservices can be augmented by an authentication scheme.

268 For our exemplary prototype we have designed and implemented a user interface aimed to assist  
 269 supervising medical staff in their task to review whether specific guideline recommendations are  
 270 applicable and adhered to in individual patients that are currently treated in wards for which they are  
 271 responsible (**Figure 4**). The user interface designed for this specific task allows the user to select the  
 272 guideline recommendation to check and then, along with an overview over the patients currently  
 273 treated in the ward, gives a condensed evaluation to which of the patients this specific  
 274 recommendation is applicable and in which of the patients it is adhered to and in which it is not.  
 275 Furthermore, the user interface allows to view the patient data on which the guideline  
 276 recommendation evaluation was performed on to allow the clinician to review the evaluator's results.  
 277 The user interface is implemented as a dashboard website using RShiny [26], but is easily exchangeable  
 278 by any other user interface framework or implementation due to the REST API interface of the user  
 279 interface backend through which it receives data.

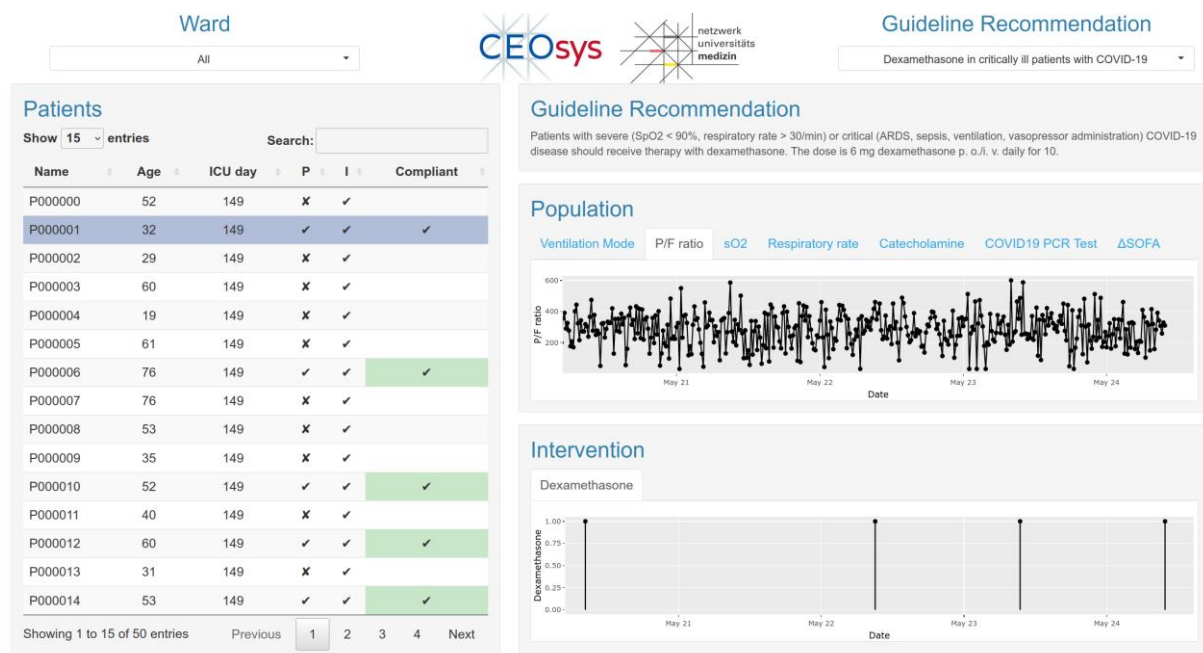

280

281 **Figure 4: Prototype implementation of the user interface.** The user can select a guideline  
 282 recommendation of interest (top right) and view the patient-individual applicability and adherence of  
 283 the recommendation on all current patients on a selected ward (left), where recommendation

284 *adherence is marked by check marks on green background. To allow the user to understand and review*  
285 *the results of the guideline recommendation evaluation, the user can select individual patients to show*  
286 *the original patient data required to assess the recommendation's applicability and adherence (right).*  
287

## 288 Demonstration of prototype utility

289 To demonstrate the utility of our prototype implementation, we have specified a recent strong  
290 evidence-based recommendation for the administration of dexamethasone to critically ill COVID-19  
291 patients from the guideline for inpatient treatment of COVID-19 patients as a machine-readable  
292 guideline recommendation [35–37]. We connected the prototype to the critical care information  
293 systems and clinical information systems of Charité – Universitätsmedizin Berlin by means of a site-  
294 specific implementation of the clinical data interface. An exemplary time-dependent analysis of a  
295 guideline recommendation’s applicability and adherence is shown in Figure 5.

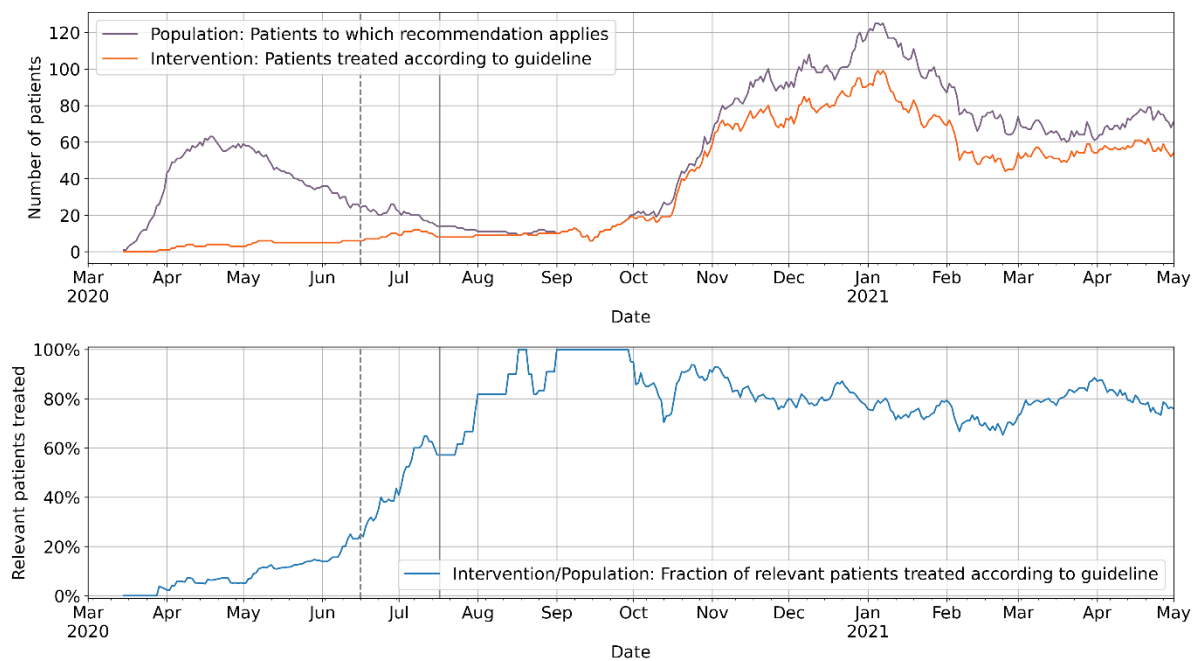

296

297 **Figure 5: Individual applicability and adherence of a guideline recommendation to treat severe and**  
298 **critical COVID-19 patients with steroids.** Top: Shown are the number of patients to which the guideline  
299 recommendation is applicable (purple) and which have been treated according to the guideline  
300 recommendation (orange) between March 2020 and May 2021. Bottom: Shown are the number of  
301 patients that are treated according to the guideline recommendation as a fraction of patients to which  
302 the guideline recommendation is applicable. Vertical gray lines indicate date of the first press release  
303 of the detected Dexamethasone efficacy in the RECOVERY trial (dashed line [38]) and the initial  
304 publication of the trial results (solid line; [39]).

## 305 Discussion

306 In this paper, we demonstrated the system architecture and prototype implementation of a clinical  
307 decision support system that automatically integrates clinical guideline recommendations with real-  
308 time clinical data to assist health care professionals by visualizing whether guideline recommendations  
309 apply to individual patients and whether the guidelines recommendations have been followed in  
310 individual patients or not. We described our stepwise approach for the development of the system,  
311 including the core requirements which shaped our software architectural design, as well as our  
312 prototype implementation and demonstrated the prototype's utility using a COVID-19 treatment  
313 guideline recommendation on clinical data.

314 To evaluate our architecture and prototype, we implemented a recent clinical guideline  
315 recommendation on treatment of patients with severe or critical COVID-19 disease and integrated the  
316 recommendation with data from a large university hospital to analyze the guideline recommendation  
317 adherence over time (Figure 5). The integration of the machine-readable guideline recommendation  
318 with clinical data could accurately detect the first and second wave of COVID-19 intensive care  
319 treatments [40] and the successful implementation of the guideline recommendation for the second  
320 wave, as seen by a >70% of relevant patients treated according to the recommendation. The non-100%  
321 guideline recommendation implementation in our specific data set is primarily due to the fact that a  
322 large part of COVID-19 patients treated in this university medicine center were transferred from other  
323 hospitals and in parts have been treated with steroids in accordance with the guideline  
324 recommendation before arriving on the intensive care unit of our hospital [41]. Such a situation in  
325 which the recommended treatment has already taken place but was recorded in a different patient  
326 data management system could be solved by increased interoperable data exchange between  
327 different health care providers.

328 An automated integration of guideline recommendations with clinical data as done by our developed  
329 systems holds several advantages: The system can provide a certain kind of decision support during  
330 individual patient treatment by pointing to applicable guideline recommendations, which the treating  
331 health care professionals might either not be aware of or which are known but whose applicability  
332 might go unnoticed. Additionally, the monitoring of guideline recommendation adherence across  
333 groups of patients provides possibilities for their use as quality and performance indicators [42,43] that  
334 can easily be monitored in real-time using a system as we propose it here. Another similar aspect could  
335 be the application of the system to monitor process implementation of new guidelines and to provide  
336 clinical insights in applicability of guideline recommendations that are useful for guideline updates.  
337 Independent from official clinical guidelines, the system can also easily be used to monitor hospital-

338 specific treatment standards by formulating them as machine-readable guideline recommendations  
339 and providing them via the guideline interface to the adherence evaluator.

340 We have designed our system to require machine-readable guideline recommendations, however,  
341 guideline recommendations are currently available only in narrative, human-readable format. Thus,  
342 individual guideline recommendations need to be converted in a machine-readable format first, adding  
343 an extra amount of work. However, the specification of guideline recommendations in a machine-  
344 readable format enforces a precise and accurate formulation of guideline recommendation preventing  
345 ambiguities, as these could not (easily) be resolved or understood by a software system. Additionally,  
346 in contrast to converting human-readable recommendations into machine-readable  
347 recommendations, the generation of precise human-readable formulations of a guideline  
348 recommendation that is formulated in a machine-readable standard is a comparably simple task.  
349 Therefore, specifying guideline recommendations from the start in a machine-readable format holds  
350 multiple advantages and we therefore consider it a desirable change in the current practice of high  
351 quality, evidence-based guideline recommendation development. An alternative approach to using a  
352 machine-readable guideline recommendation specification could be the application of recent  
353 advances of natural language processing (NLP) methods to allow the computer to “understand” and  
354 process human-readable guideline recommendations [44,45]. However, any errors unknowingly  
355 introduced by such an approach (e.g., due to imperfect “understanding” of the guideline  
356 recommendation by the NLP algorithms) could have severe consequences on patient health and  
357 outcomes. Therefore, we believe that the explicit statement of guideline recommendations in a  
358 standardized machine-readable format is currently the more suitable choice.

359 In our prototype implementation we have used an EBMonFHIR-based representation of clinical  
360 guideline recommendations that covers the whole development process of evidence-based guidelines,  
361 from the underlying systematic review of available evidence over the rating of the individual evidence  
362 to the final recommendation in a computer-interpretable way [23]. The computer-interpretable links  
363 to the development process are particularly useful in meeting the requirement of the system to adapt  
364 to updated guideline recommendations (requirement #3), as updates to recommendations based on  
365 new evidence or re-appraisal of existing evidence can be automatically passed to the system without  
366 the need of newly and manually converting human-readable guideline recommendations into a  
367 representation formalism. While requirement #3 could in principle be met by any guideline  
368 recommendation formalisms that is semantically correct, complete, and unambiguous, the CPG-on-  
369 EBMonFHIR representation offers an advantage especially with guideline recommendations that are  
370 updated regularly, such as recommendations from living guidelines. Additionally, the CPG-on-  
371 EBMonFHIR representation could allow the users of the software system to evaluate the certainty of  
372 the evidence and the evidence-to-decision process underlying individual recommendations. We did



373 not include this functionality in the prototype implementation, which, however, may become part of  
374 a later extension stage of the system implementation.

375 In our approach, the user interface is separated from the rest of the software to allow user- and  
376 context-specific implementation of user interfaces. We have provided a prototype as a dashboard  
377 website to demonstrate its feasibility. However, in clinical practice during individual treatment it might  
378 be desirable to integrate the suggestions of guideline recommendations into the clinical information  
379 system (CIS) that is implemented on the ward. Due to the separation of user interface and backend in  
380 our system, these integrations could be readily implemented depending on the CIS, e.g. as SMART-on-  
381 FHIR clinical decision support (CDS) hooks [46,47], if the CIS provides a SMART-on-FHIR interface.

382 We have designed our software system to retrieve guideline recommendations from a centralized  
383 repository, which could be hosted by medical societies or national standardization organizations. This  
384 allows these societies or organizations to develop guideline recommendations independently of our  
385 system, thereby focusing on their expertise. Once new or updated guideline recommendations are  
386 published by the medical societies or organizations on their servers, they can be automatically  
387 retrieved by our system and integrated with clinical data. However, a checkpoint in this process should  
388 be established, where health care professionals of the individual hospitals first review new or updated  
389 guideline recommendations retrieved from the central repository before releasing them for  
390 implementation in their hospital. This helps to mitigate risks that arise if the central guideline  
391 recommendation server is compromised by malicious attackers and also ensures that the guideline  
392 recommendations implemented in the hospitals are in accordance with the hospitals' policies.

## 393 Conclusion

394 In this work, we have designed a system that integrates guideline recommendations with real-time  
395 clinical data to evaluate individual guideline recommendation adherence and developed a functional  
396 prototype. The proposed system holds advantages both for the individual treatment of patients, as  
397 clinical guidelines condense the current state of medical knowledge into treatment recommendations,  
398 and for quality management and monitoring of patient treatment standards in hospitals. We have  
399 specified a modular software architecture where each module corresponds to a particular area of  
400 expertise, allowing experts from different fields (guideline developers, software engineers, medical  
401 data engineers and health care professionals) to work independently and focus on their area of  
402 expertise. We have released the source code of our system under an open source license (see code  
403 availability) and invite for cooperation and collaborative further development of the system [48].

## 404 Funding

405 The COVID-19 Evidence Ecosystem (CEOsys) project is funded under a scheme issued by the Network  
406 of University Medicine (Nationales Forschungsnetzwerk der Universitätsmedizin (NUM)) by the  
407 Federal Ministry of Education and Research of Germany (Bundesministerium für Bildung und  
408 Forschung (BMBF)) grant number 01KX2021. The CODEX+ project is funded under a scheme issued by  
409 the Network of University Medicine (Nationales Forschungsnetzwerk der Universitätsmedizin (NUM))  
410 by the Federal Ministry of Education and Research of Germany (Bundesministerium für Bildung und  
411 Forschung (BMBF)) grant number 01KX2121.

## 412 Code availability

413 The complete code of the clinical guideline recommendation system is published under an open-source  
414 license (AGPL v3.0) at <https://github.com/CEOsys/grevaluator>. API-level documentation can be found  
415 at <https://ceosys.readthedocs.io/>.

416

## 417 References

- 418 1. Institute of Medicine (US) Committee to Advise the Public Health Service on Clinical Practice  
419 Guidelines. Clinical Practice Guidelines: Directions for a New Program [Internet]. Field MJ, Lohr  
420 KN, editors. Washington (DC): National Academies Press (US); 1990 [cited 2021 Sep 9].  
421 PMID:25144032ISBN:978-0-309-04346-5
- 422 2. Institute of Medicine (US) Committee on Quality of Health Care in America. Crossing the Quality  
423 Chasm: A New Health System for the 21st Century [Internet]. Washington (DC): National  
424 Academies Press (US); 2001 [cited 2021 Sep 9]. PMID:25057539ISBN:978-0-309-07280-9
- 425 3. Institute of Medicine (US) Committee on Standards for Developing Trustworthy Clinical Practice  
426 Guidelines. Clinical Practice Guidelines We Can Trust [Internet]. Graham R, Mancher M, Miller  
427 Wolman D, Greenfield S, Steinberg E, editors. Washington (DC): National Academies Press (US);  
428 2011 [cited 2021 Sep 14]. PMID:24983061ISBN:978-0-309-16422-1
- 429 4. Djulbegovic B, Guyatt G. Evidence vs Consensus in Clinical Practice Guidelines. JAMA 2019 Aug  
430 27;322(8):725. [doi: 10.1001/jama.2019.9751]
- 431 5. Djulbegovic B, Guyatt GH. Progress in evidence-based medicine: a quarter century on. The Lancet  
432 2017 Jul 22;390(10092):415–423. [doi: 10.1016/S0140-6736(16)31592-6]
- 433 6. Trogrlic Z, van der Jagt M, Lingsma H, Gommers D, Ponssen HH, Schoonderbeek JFJ, Schreiner F,  
434 Verbrugge SJ, Duran S, Bakker J, Ista E. Improved Guideline Adherence and Reduced Brain  
435 Dysfunction After a Multicenter Multifaceted Implementation of ICU Delirium Guidelines in 3,930  
436 Patients. Crit Care Med 2019 Mar;47(3):419–427. [doi: 10.1097/CCM.0000000000003596]
- 437 7. Kavanagh BP, Nurok M. Standardized Intensive Care. Protocol Misalignment and Impact  
438 Misattribution. Am J Respir Crit Care Med American Thoracic Society - AJRCCM; 2016 Jan  
439 1;193(1):17–22. [doi: 10.1164/rccm.201502-0314CP]
- 440 8. van Steenkiste J, Larson S, Ista E, van der Jagt M, Stevens RD. Impact of structured care systems  
441 on mortality in intensive care units. Intensive Care Med 2021 Mar 27;1–3. PMID:33774712
- 442 9. Cabana MD, Rand CS, Powe NR, Wu AW, Wilson MH, Abboud P-AC, Rubin HR. Why Don't  
443 Physicians Follow Clinical Practice Guidelines?A Framework for Improvement. JAMA 1999 Oct  
444 20;282(15):1458–1465. [doi: 10.1001/jama.282.15.1458]
- 445 10. Trogrlić Z, van der Jagt M, Bakker J, Balas MC, Ely EW, van der Voort PHJ, Ista E. A systematic  
446 review of implementation strategies for assessment, prevention, and management of ICU  
447 delirium and their effect on clinical outcomes. Crit Care Lond Engl 2015 Apr 9;19:157.  
448 PMID:25888230
- 449 11. Fischer F, Lange K, Klose K, Greiner W, Kraemer A. Barriers and Strategies in Guideline  
450 Implementation—A Scoping Review. Healthcare 2016 Jun 29;4(3):36. PMID:27417624
- 451 12. Zhang Z, Hong Y, Liu N. Scientific evidence underlying the recommendations of critical care  
452 clinical practice guidelines: a lack of high level evidence. Intensive Care Med 2018 Jul;44(7):1189–  
453 1191. [doi: 10.1007/s00134-018-5142-8]
- 454 13. Stamm TA, Andrews MR, Mosor E, Ritschl V, Li LC, Ma JK, Campo-Arias A, Baker S, Burton NW,  
455 Eghbali M, Fernandez N, Ferreira RJO, Gäbler G, Makri S, Mintz S, Moe RH, Morasso E, Murphy  
456 SL, Ntuli S, Omara M, Simancas-Pallares MA, Horonieff J, Gartlehner G. The methodological

- 457 quality is insufficient in clinical practice guidelines in the context of COVID-19: systematic review.  
458 J Clin Epidemiol 2021 Jul 1;135:125–135. [doi: 10.1016/j.jclinepi.2021.03.005]
- 459 14. Ash JS, Sittig DF, Campbell EM, Guappone KP, Dykstra RH. Some Unintended Consequences of  
460 Clinical Decision Support Systems. AMIA Annu Symp Proc 2007;2007:26–30. PMID:18693791
- 461 15. Tu SW, Campbell JR, Glasgow J, Nyman MA, McClure R, McClay J, Parker C, Hrabak KM, Berg D,  
462 Weida T, Mansfield JG, Musen MA, Abarbanel RM. The SAGE Guideline Model: Achievements  
463 and Overview. J Am Med Inform Assoc JAMIA 2007;14(5):589–598. PMID:17600098
- 464 16. Tu SW, Musen MA. Modeling Data and Knowledge in the EON Guideline Architecture. MEDINFO  
465 2001 IOS Press; 2001;280–284. [doi: 10.3233/978-1-60750-928-8-280]
- 466 17. Boxwala AA, Peleg M, Tu S, Ogunyemi O, Zeng QT, Wang D, Patel VL, Greenes RA, Shortliffe EH.  
467 GLIF3: a representation format for sharable computer-interpretable clinical practice guidelines.  
468 J Biomed Inform 2004 Jun 1;37(3):147–161. [doi: 10.1016/j.jbi.2004.04.002]
- 469 18. Samwald M, Fehre K, de Bruin J, Adlassnig K-P. The Arden Syntax standard for clinical decision  
470 support: Experiences and directions. J Biomed Inform 2012 Aug 1;45(4):711–718. [doi:  
471 10.1016/j.jbi.2012.02.001]
- 472 19. Seyfang A, Miksch S, Marcos M. Combining diagnosis and treatment using asbru. Int J Med Inf  
473 2002 Dec 18;68(1):49–57. [doi: 10.1016/S1386-5056(02)00064-3]
- 474 20. Ciccarese P, Caffi E, Quaglini S, Stefanelli M. Architectures and tools for innovative Health  
475 Information Systems: The Guide Project. Int J Med Inf 2005 Aug 1;74(7):553–562. [doi:  
476 10.1016/j.ijmedinf.2005.02.001]
- 477 21. Silva A, Oliveira T, Gonçalves F, Novais P. Enhancing decision making by providing a unified system  
478 for computer-interpretable guideline management. Expert Syst 2021;38(5):e12412. [doi:  
479 10.1111/exsy.12412]
- 480 22. Sutton RT, Pincock D, Baumgart DC, Sadowski DC, Fedorak RN, Kroeker KI. An overview of clinical  
481 decision support systems: benefits, risks, and strategies for success. Npj Digit Med 2020 Feb  
482 6;3(1):1–10. [doi: 10.1038/s41746-020-0221-y]
- 483 23. Lichtner G, Jurth C, Alper BS, Spies C, Boeker M, Meerpohl JJ, Dincklage F von. Representation of  
484 evidence-based clinical practice guideline recommendations on FHIR [Internet]. medRxiv; 2022  
485 [cited 2022 May 24]. p. 2022.05.16.22275120. [doi: 10.1101/2022.05.16.22275120]
- 486 24. What is CEOsys? [Internet]. CEOsys. [cited 2022 Apr 8]. Available from: [https://covid-  
487 evidenz.de/what-is-ceosys/](https://covid-evidenz.de/what-is-ceosys/)
- 488 25. Fielding RT. Architectural styles and the design of network-based software architectures [phd].  
489 University of California, Irvine; 2000.
- 490 26. Chang W, Cheng J, Allaire JJ, Sievert C, Schloerke B, Xie Y, Allen J, McPherson J, Dipert A, Borges  
491 B. shiny: Web Application Framework for R [Internet]. 2021 [cited 2021 Sep 29]. Available from:  
492 <https://CRAN.R-project.org/package=shiny>
- 493 27. Kluge S, Janssens U, Welte T, Weber-Carstens S, Schälte G, Spinner CD, Malin JJ, Gastmeier P,  
494 Langer F, Wepler M, Westhoff M, Pfeifer M, Rabe KF, Hoffmann F, Böttiger BW, Weinmann-  
495 Menke J, Kersten A, Berlit P, Krawczyk M, Nehls W, Haase R, Nothacker M, Marx G, Karagiannidis  
496 C. S3-Leitlinie Empfehlungen zur stationären Therapie von Patienten mit COVID-19 [Internet].

- 497 AWMF (Arbeitsgemeinschaft der Wissenschaftlichen Medizinischen Fachgesellschaften e.V.);  
498 2021 May. Report No.: 113/001, Evidence-based Recommendation #5. Available from:  
499 <https://www.awmf.org/leitlinien/detail/II/113-001LG.html>
- 500 28. Schardt C, Adams MB, Owens T, Keitz S, Fontelo P. Utilization of the PICO framework to improve  
501 searching PubMed for clinical questions. *BMC Med Inform Decis Mak* 2007 Jun 15;7(1):16. [doi:  
502 10.1186/1472-6947-7-16]
- 503 29. Peleg M. Computer-interpretable clinical guidelines: A methodological review. *J Biomed Inform*  
504 2013 Aug 1;46(4):744–763. [doi: 10.1016/j.jbi.2013.06.009]
- 505 30. Isern D, Moreno A. Computer-based execution of clinical guidelines: A review. *Int J Med Inf* 2008  
506 Dec 1;77(12):787–808. [doi: 10.1016/j.ijmedinf.2008.05.010]
- 507 31. Riaño D, Peleg M, ten Teije A. Ten years of knowledge representation for health care (2009–  
508 2018): Topics, trends, and challenges. *Artif Intell Med* 2019 Sep;100:101713. [doi:  
509 10.1016/j.artmed.2019.101713]
- 510 32. OMOP Common Data Model [Internet]. [cited 2022 Mar 24]. Available from:  
511 <https://ohdsi.github.io/CommonDataModel/>
- 512 33. FHIR US Core [Internet]. [cited 2022 Mar 24]. Available from: <https://www.hl7.org/fhir/us/core/>
- 513 34. Sass J, Bartschke A, Lehne M, Essenwanger A, Rinaldi E, Rudolph S, Heitmann KU, Vehreschild JJ,  
514 von Kalle C, Thun S. The German Corona Consensus Dataset (GECCO): a standardized dataset for  
515 COVID-19 research in university medicine and beyond. *BMC Med Inform Decis Mak* 2020 Dec  
516 21;20(1):341. [doi: 10.1186/s12911-020-01374-w]
- 517 35. Malin JJ, Spinner CD, Janssens U, Welte T, Weber-Carstens S, Schälte G, Gastmeier P, Langer F,  
518 Wepler M, Westhoff M, Pfeifer M, Rabe KF, Hoffmann F, Böttiger BW, Weinmann-Menke J,  
519 Kersten A, Berlit P, Krawczyk M, Nehls W, Fichtner F, Laudi S, Stegemann M, Skoetz N, Nothacker  
520 M, Marx G, Karagiannidis C, Kluge S. Key summary of German national treatment guidance for  
521 hospitalized COVID-19 patients : Key pharmacologic recommendations from a national German  
522 living guideline using an Evidence to Decision Framework (last updated 17.05.2021). *Infection*  
523 2021 Jul 6; PMID:34228347
- 524 36. AWMF. S3 Leitlinie Empfehlungen zur stationären Therapie von Patienten mit COVID-19  
525 (Registernummer 113-001). *Assoc Sci Med Soc Ger AWMF* [Internet] 2021 May 17 [cited 2021  
526 Sep 10]; Available from: <https://www.awmf.org/leitlinien/detail/II/113-001.html>
- 527 37. Kluge S, Janssens U, Spinner CD, Pfeifer M, Marx G, Karagiannidis C, Guideline group. Clinical  
528 Practice Guideline: Recommendations on Inpatient Treatment of Patients with COVID-19. *Dtsch*  
529 *Arzteblatt Int* 2021 Jan 11;118(Forthcoming):arztebl.m2021.0110. PMID:33531113
- 530 38. Dexamethasone reduces death in hospitalised patients with severe respiratory complications of  
531 COVID-19 | University of Oxford [Internet]. [cited 2021 Sep 13]. Available from:  
532 [https://www.ox.ac.uk/news/2020-06-16-dexamethasone-reduces-death-hospitalised-patients-](https://www.ox.ac.uk/news/2020-06-16-dexamethasone-reduces-death-hospitalised-patients-severe-respiratory-complications)  
533 [severe-respiratory-complications](https://www.ox.ac.uk/news/2020-06-16-dexamethasone-reduces-death-hospitalised-patients-severe-respiratory-complications)
- 534 39. Dexamethasone in Hospitalized Patients with Covid-19. *N Engl J Med Massachusetts Medical*  
535 *Society*; 2021 Feb 25;384(8):693–704. [doi: 10.1056/NEJMoa2021436]

- 536 40. Karagiannidis C, Windisch W, McAuley DF, Welte T, Busse R. Major differences in ICU admissions  
537 during the first and second COVID-19 wave in Germany. *Lancet Respir Med Elsevier*; 2021 May  
538 1;9(5):e47–e48. PMID:33684356
- 539 41. Wiesner B, Bachmann M, Blum T-G, Forchheim S, Geiseler J, Kassin A, Kretzschmar E, Weber-  
540 Carstens S, Westhoff M, Witzenrath M, Grohé C. Aufgaben der Weaning-Zentren im Pandemiefall  
541 COVID-19. *Pneumol Stuttg Ger* 2020 Jun;74(6):358–365. PMID:32294763
- 542 42. Kumpf O, Nothacker M, Braun J, Muhl E. The future development of intensive care quality  
543 indicators – a methods paper. *GMS Ger Med Sci German Medical Science GMS Publishing House*;  
544 2020 Oct 30;18:Doc09. [doi: 10.3205/000285]
- 545 43. Artis KA, Dweik RA, Patel B, Weiss CH, Wilson KC, Gagliardi AR, Huckson S, Nothacker M, Adhikari  
546 NKJ, Kajdacsy-Balla Amaral AC, Barbash IJ, Carlos WG, Costa DK, Metersky ML, Mularski RA,  
547 Sjoding MW, Thomson CC, Hyzy RC. Performance Measure Development, Use, and Measurement  
548 of Effectiveness Using the Guideline on Mechanical Ventilation in Acute Respiratory Distress  
549 Syndrome. An Official American Thoracic Society Workshop Report. *Ann Am Thorac Soc* 2019  
550 Dec;16(12):1463–1472. PMID:31774323
- 551 44. Becker M, Böckmann B. Personalized Guideline-Based Treatment Recommendations Using  
552 Natural Language Processing Techniques. *Stud Health Technol Inform* 2017;235:271–275.  
553 PMID:28423796
- 554 45. Fazlic LB, Hallawa A, Schmeink A, Peine A, Martin L, Dartmann G. A Novel NLP-FUZZY System  
555 Prototype for Information Extraction from Medical Guidelines. 2019 42nd Int Conv Inf Commun  
556 Technol Electron Microelectron MIPRO 2019. p. 1025–1030. [doi:  
557 10.23919/MIPRO.2019.8756929]
- 558 46. Mandel JC, Kreda DA, Mandl KD, Kohane IS, Ramoni RB. SMART on FHIR: a standards-based,  
559 interoperable apps platform for electronic health records. *J Am Med Inform Assoc JAMIA* 2016  
560 Sep;23(5):899–908. PMID:26911829
- 561 47. CDS Hooks [Internet]. [cited 2021 Sep 9]. Available from: <https://cds-hooks.hl7.org/>
- 562 48. Paton C, Karopka T. The Role of Free/Libre and Open Source Software in Learning Health Systems.  
563 *Yearb Med Inform Georg Thieme Verlag KG*; 2017 Aug;26(1):53–58. [doi: 10.15265/IY-2017-006]
- 564
